# Supplementary material for: Template-free synthesis and lithium-ion storage performance of multiple ZnO nanoparticles encapsulated in hollow amorphous carbon shells
Source: Royal Society of Chemistry journal article supplement (doi:10.1039/d0ra02497j), 2020-01-01
Supplement: d0ra02497j1.pdf [file d0ra02497j1.pdf]

## Supporting Information

### Template Free Synthesis and Lithium Ion Storage Performance of Multiple ZnO Nanoparticles @ Hollow Amorphous Carbon Shell

Yunxia Jin<sup>1,2,3\*</sup>, Shimin Wang<sup>2,3</sup>, Jia Li<sup>1</sup>, Sheng Qu<sup>1</sup>, Liufang Yang<sup>1</sup>, Junming Guo<sup>2,3\*</sup>

1.School of Electrical and Information Tehnology, Yunnan Minzu University, Kunming 650500, China.

2.School of Chemistry and Environment, Yunnan Minzu University, Kunming 650500, China.

3.National and Local Joint Engineering Research Center for Green Preparation Technology of Biobased Materials, Yunnan Minzu University, Kunming 650500, China.

\* Corresponding authors.

Email: [jyx1601@aliyun.com](mailto:jyx1601@aliyun.com); [guojunmingkm@163.com](mailto:guojunmingkm@163.com)

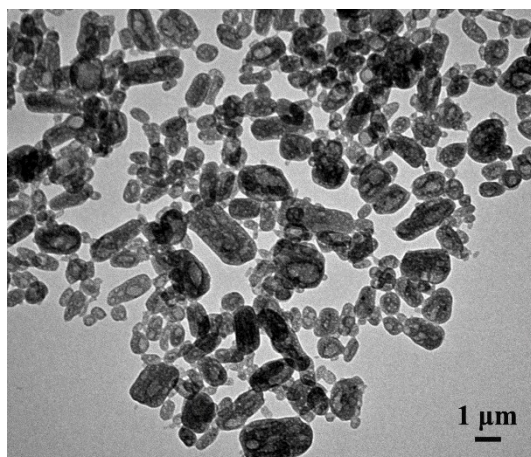

Fig. S1 TEM image of zinc hydroxide carbonate nanoparticles.

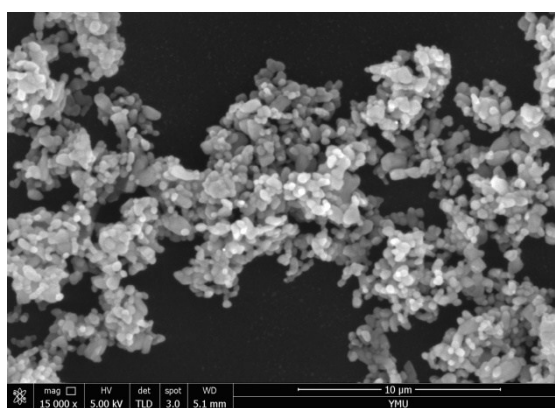

Fig. S2 SEM image of zinc hydroxide carbonate nanoparticles.

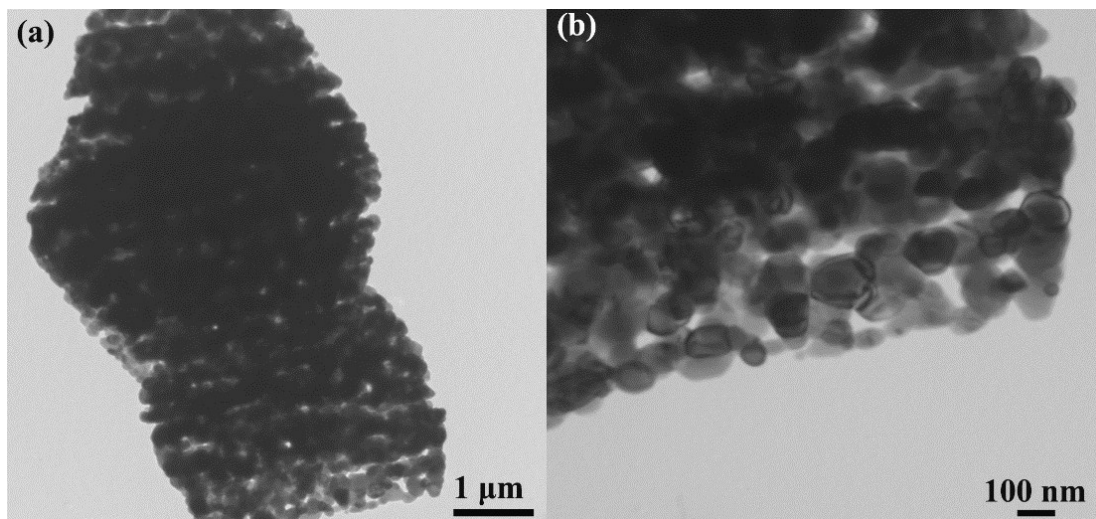

Fig. S3 TEM (a) and enlarged TEM image (b) of pure ZnO nanoparticles.

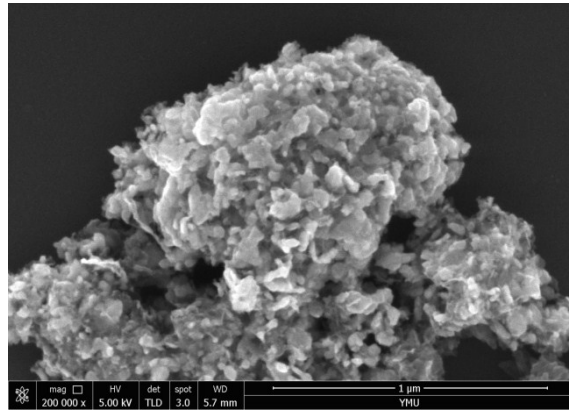

Fig. S4 SEM image of ZnO@AC.
